# Supplementary material for: Analysis of mRNA Expression Patterns in Peripheral Blood Cells of 3 Patients With Cancer After the First Fraction of 2 Gy Irradiation: An Integrated Case Report and Systematic Review
Source: PubMed Central journal article supplement — Dose Response. 2019 Feb 26;17(1):1559325819833474. doi: 10.1177/1559325819833474 (PMC6393837; doi:10.1177/1559325819833474), 2019-02-26
Supplement: Supplementary-table1.pdf [file Supplementary-table1.pdf]

STable 1 Clinical and pathological characteristics of enrolled 3 cases

| Variable                      | Cervical Cancer    | Naso-pharyngeal Cancer         | Tongue Cancer      |
|-------------------------------|--------------------|--------------------------------|--------------------|
| Age(years)                    | 55                 | 63                             | 53                 |
| Gender                        | female             | male                           | male               |
| Weight(kg)                    | 50                 | 62.3                           | 50                 |
| Occupation                    | peasant            | peasant                        | Civil servant      |
| smoking                       | never              | Average, 2-5 cigarette per day | never              |
| Drink                         | never              | Average, 1 time per month      | occasionally       |
| Stage                         | IIIB               | T4N2M0 IVA                     | T1N2M0 IVA         |
| Total integral radiation dose | 60Gy               | 70Gy                           | 60Gy               |
| White cells prior to IR       | $8.15 \times 10^9$ | $4.28 \times 10^9$             | $4.98 \times 10^9$ |
| White cells post IR           | $9.26 \times 10^9$ | $5.45 \times 10^9$             | $4.18 \times 10^9$ |
| platelet prior to IR          | $348 \times 10^9$  | $151 \times 10^9$              | $210 \times 10^9$  |
| platelet post IR              | $364 \times 10^9$  | $161 \times 10^9$              | $190 \times 10^9$  |
| Hemoglobin prior to IR        | 116g/L             | 130g/L                         | 115g/L             |
| Hemoglobin post IR            | 119g/L             | 139g/L                         | 112g/L             |
